# Supplementary material
Source: PubMed Central journal article supplement (PMC2987735)
Supplement: NIHMS246315-supplement-1_si_001.pdf [file NIHMS246315-supplement-1_si_001.pdf]

**Supplemental Information for**  
**Self-Protecting Bactericidal Titanium Alloy Surface Formed by Covalent Bonding**  
**of Daptomycin Bisphosphonates**

Chang-Po Chen, Eric Wickstrom\*

Department of Biochemistry and Molecular Biology, Thomas Jefferson University,  
Philadelphia, PA 19107

\* To whom correspondence should be addressed, at Department of Biochemistry and  
Molecular Biology, Thomas Jefferson University, Bluemle 219, 233 South 10<sup>th</sup> Street,  
Philadelphia, PA 19107. Tel: 1.215.955.4578. Fax: 1.215.955.4579. E-mail:  
eric@tesla.jci.tju.edu

**Minimum inhibitory concentrations.** Minimum inhibitory concentrations (MIC) were determined with *Staphylococcus aureus* strain 25923 (ATCC, Germantown, MD), by broth microdilution according to NCCLS guidelines (1) for aerobic Gram-positive organisms. *S. aureus* were maintained in Müller-Hinton broth supplemented with 50 mg/L calcium chloride, according to the Cubist Pharmaceuticals protocol, at a final *S. aureus* titer of  $5 \times 10^5$  cfu/ml, using daptomycin (**1**) as the positive control. All assays were performed in triplicate at 37°C.

**Table 1.** MIC of daptomycin and its derivatives

| Compound Name                        | MIC, $\mu\text{g/ml}$ |
|--------------------------------------|-----------------------|
| Daptomycin <b>1</b>                  | 0.8                   |
| DAP-TEG-bisphosphonic acid, <b>5</b> | 8.0                   |

- (1) Jorgensen, J. H., Cleeland, W. A., Craig, G., Doern, M., Ferraro, J., Finegold, C. M., Hansen, S. L., Jenkins, S. G., Novick, W. J., and Pfaller, M. A. (1993) Methods for dilution antimicrobial susceptibility tests for bacteria that grow aerobically, 3rd approved standard. *National Committee for Clinical Laboratory Standards 13*, 1-12.
